# Supplementary material for: Maternal Loss of miRNAs Leads to Increased Variance in Primordial Germ Cell Numbers in Drosophila melanogaster
Source: PubMed Central journal article supplement (PMC3755917; doi:10.1534/g3.113.007591), 2013-09-01
Supplement: supp_g3.113.007591_007591SI.pdf [file supp_g3.113.007591_007591SI.pdf]

**Maternal loss of miRNAs leads to increased variance in primordial germ cell numbers in *Drosophila melanogaster***

Jan-Michael Kugler<sup>\*,‡</sup>, Ya-Wen Chen<sup>\*</sup>, Ruifen Weng<sup>\*,§</sup>  
and Stephen M. Cohen<sup>\*,§</sup>

<sup>\*</sup>) Institute of Molecular and Cell Biology, Singapore 138673, Singapore

<sup>§</sup>) Department of Biological Sciences, National University of Singapore, Singapore 119613, Singapore

<sup>‡</sup>) E-mail: [jmkugler@imcb.a-star.edu.sg](mailto:jmkugler@imcb.a-star.edu.sg)

DOI: 10.1534/g3.113.007591

**A**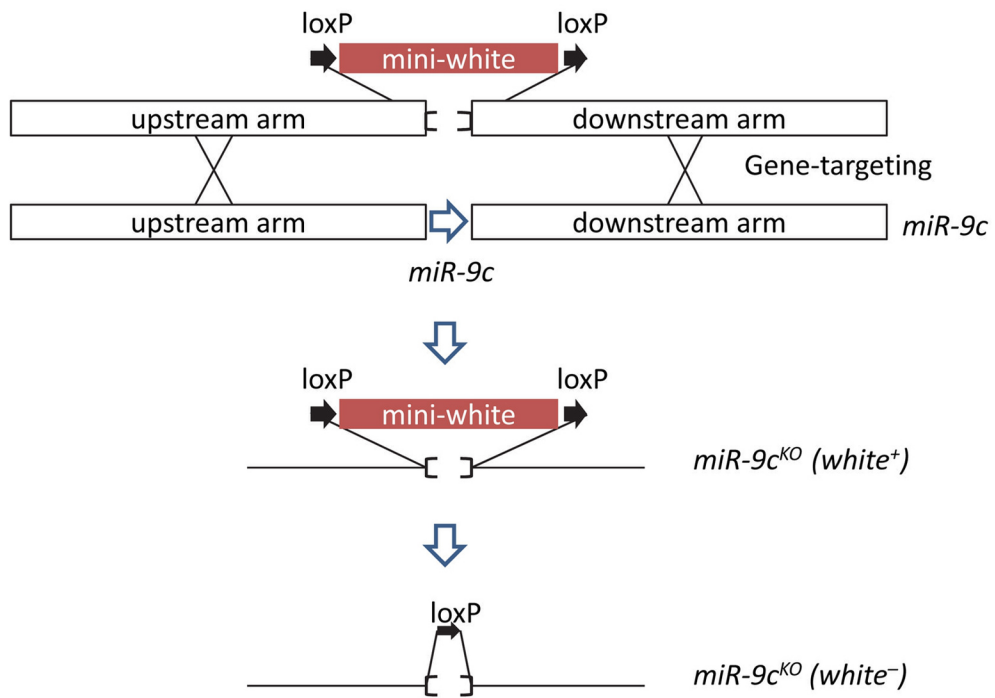**B**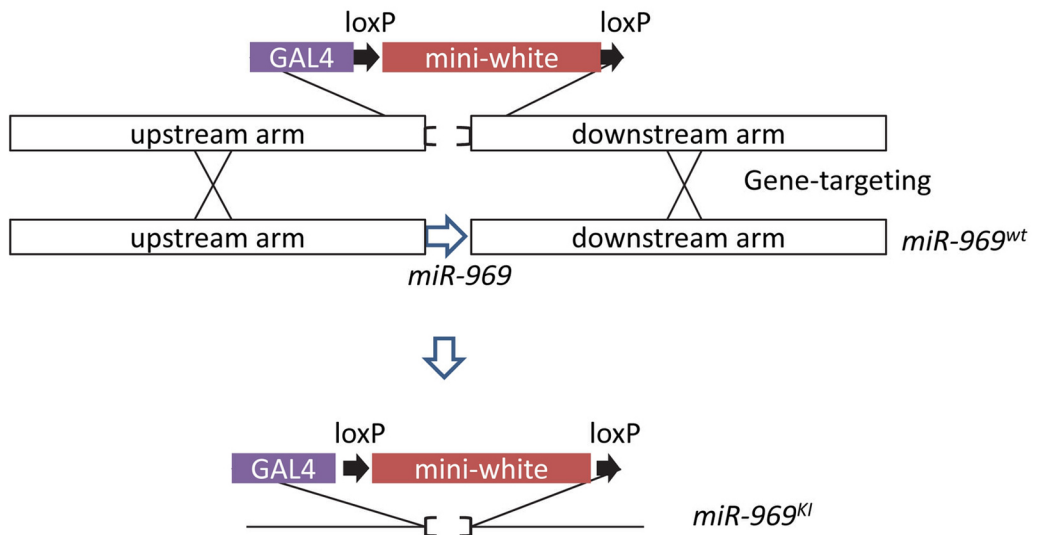

**Suppl. Fig. 1: Generation of *miR-9c* and *miR-969* knockout deletions through homologous recombination**

- A. The endogenous *miR-9c* stemloop sequence was first replaced by a mini-white transgene through ends-out targeting. Afterwards, the mini-white transgene was removed by Cre-loxP-mediated recombination.
- B. The endogenous *miR-969* stemloop was replaced by a Gal4 transgene, followed by mini-white. This places the Gal4 transgene under the control of the miR-969 promoter.

**Table S1 Raw data: germ cell numbers in miRNA mutant and rescued embryos.**

Table S1 is available for download at <http://www.g3journal.org/lookup/suppl/doi:10.1534/g3.113.007591/-/DC1>.
